# Supplementary material
Source: HighWire-hosted journal article supplement (http://molpharm.aspetjournals.org/highwire/filestream/80495/field_highwire_adjunct_files/0/Supplemental_108290.pdf)
Supplement: Supplemental_108290.pdf [file Supplemental_108290.pdf]

“Halogenated ethers, alcohols, and alkanes activate TASK-3 tandem pore potassium channels likely through a common mechanism”. Anita Luethy, James D. Boghosian, Rithu Srikantha, and Joseph F. Cotten. *Molecular Pharmacology*.

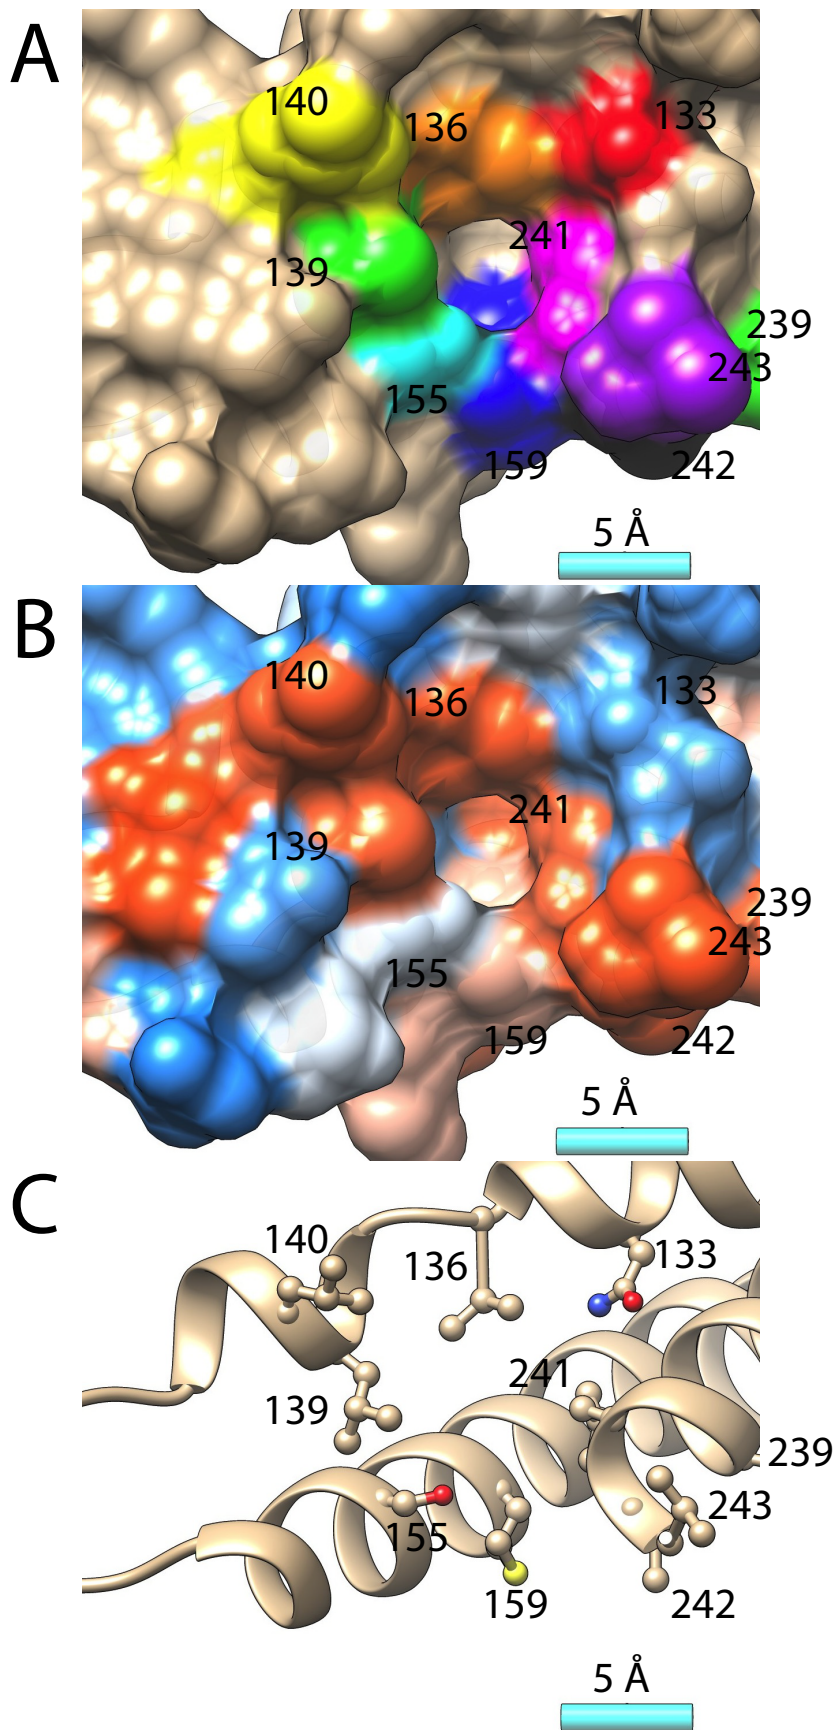

**Figure S1. Surface rendering of the putative anesthetic binding site in the TASK-3 homology model.** A, close up of the putative anesthetic binding site. Contribution of relevant amino acids to the surface are demarcated by color: Met-133 (red), Val-136 (orange), Leu-139 (green), Leu-140 (yellow), Met-159 (blue), Leu-239 (green), Leu-241 (magenta), Leu-242 (black), and Val-243 (purple). B, identical structure as in A, but with molecular surfaces colored by Kyte-Doolittle amino acid hydrophobicity (dodger blue for the most hydrophilic, to white, to orange-red for most hydrophobic). C, ribbon diagram of identical structure as in A & B, but with surface rendering removed and residue side chains represented by ball and stick.

“Halogenated ethers, alcohols, and alkanes activate TASK-3 tandem pore potassium channels likely through a common mechanism”. Anita Luethy, James D. Boghosian, Rithu Srikantha, and Joseph F. Cotten. *Molecular Pharmacology*.

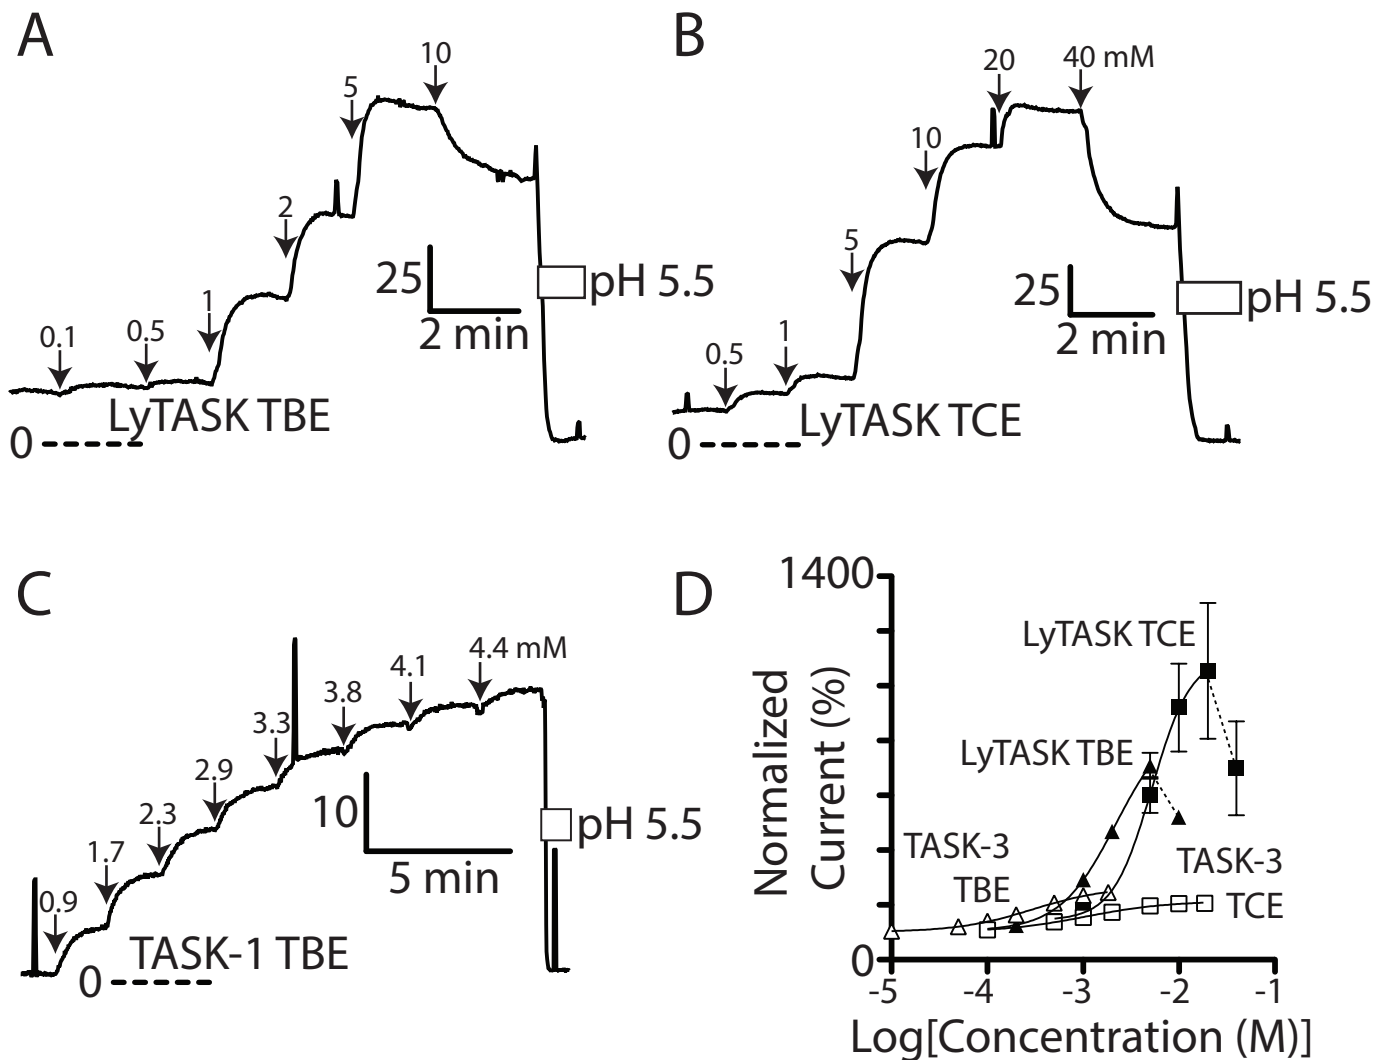

**Figure S2. LyTASK and TASK-1 channel function is activated by halogenated ethanols.** A, Ussing chamber potassium current records using Fischer rat thyroid cell monolayers transiently expressing LyTASK (A and B) and TASK-1 (C). Data were collected as described in Fig. 3 with  $n = 3$  to  $8 \pm$  SD for each. D, LyTASK and TASK-3 concentration-response for TCE and TBE. Data points for LyTASK were fitted as in Fig. 3, but with the highest concentration point excluded. LyTASK TCE and TBE data, respectively, for  $I_{max}$  (in %; 95% confidence): 1179(849 to 1509) and 912(754 to 1070).  $EC_{50}$  (in mM): 5.2(3.1 to 8.9) and 2.3(1.6 to 3.2). HillSlope: 1.6(0.5 to 2.7), 1.4(1.1 to 1.7).

“Halogenated ethers, alcohols, and alkanes activate TASK-3 tandem pore potassium channels likely through a common mechanism”. Anita Luethy, James D. Boghosian, Rithu Srikantha, and Joseph F. Cotten. *Molecular Pharmacology*.

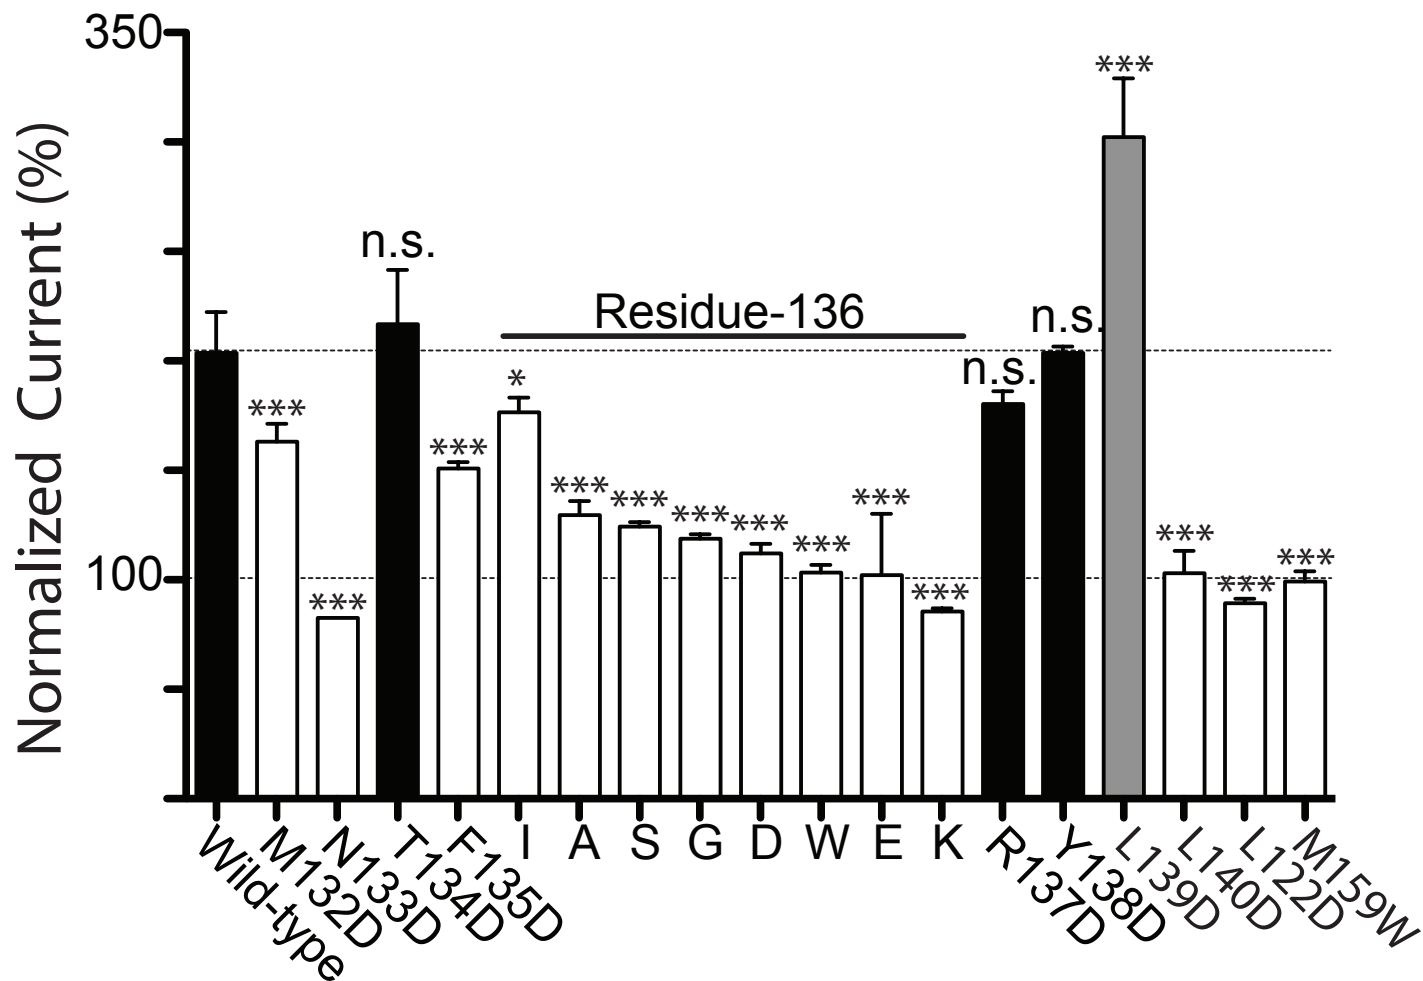

**Figure S3. Comparison of 10 mM 2,2,2-trichloroethanol activation of TASK-3 at residues-132 to -140.** Data were derived from that presented in Fig. 5.  $n = 3$  to  $8 \pm$  SD for each. Asterisks (\*\*\*, \*\*, and \*) indicate significance ( $P < 0.001$ ,  $0.01$ , and  $0.05$ ) relative to wild-type TASK-3 as determined by a one-way ANOVA and a post-hoc Bonferroni multiple comparison test.

“Halogenated ethers, alcohols, and alkanes activate TASK-3 tandem pore potassium channels likely through a common mechanism”. Anita Luethy, James D. Boghosian, Rithu Srikantha, and Joseph F. Cotten. *Molecular Pharmacology*.

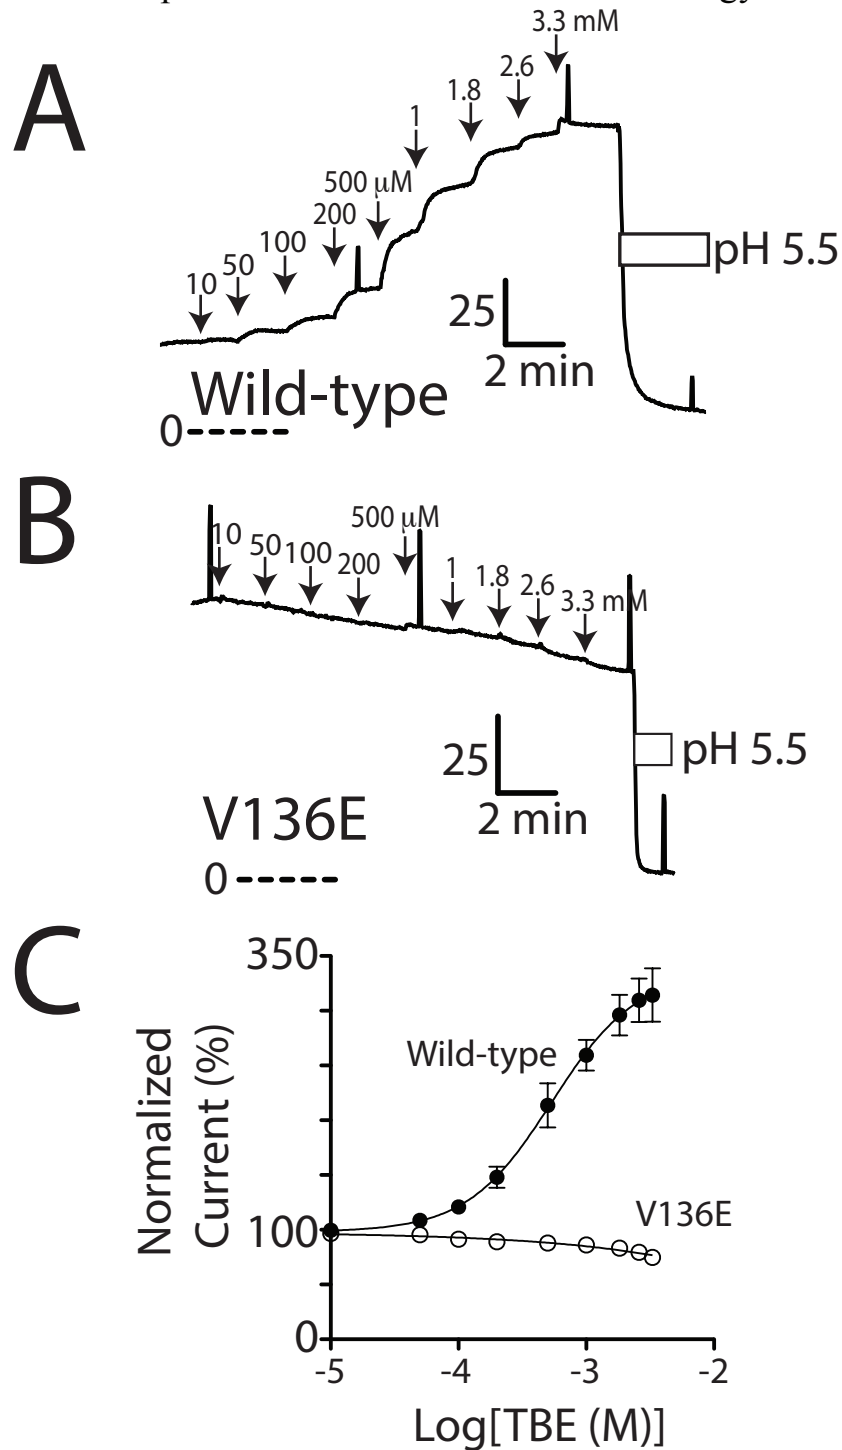

**Figure S4. 2,2,2-tribromoethanol (TBE) activates "yeast optimized" wild-type TASK-3, but not "yeast optimized" V136E rTASK-3.** TASK3 was optimized by random mutagenesis for yeast expression and contains the following missense mutations: T17I, D27E, D32G, K79E, F202L, and F246Y. Data were collected as described in Fig. 3. Using chamber potassium current records using Fischer rat thyroid cell monolayers expressing "yeast optimized" wild-type TASK-3 (A) and "yeast optimized" V136E TASK-3 (B) exposed to increasing concentrations of TBE. C, compiled TBE concentration-response data ( $n = 3 \pm$  SD for each). Data points for "yeast optimized" wild-type rTASK-3 were fitted as in Fig. 3.  $I_{max}$  (in %; 95% confidence) = 333(308 to 359).  $EC_{50}$  (in  $\mu$ M): 539(414 to 712). HillSlope: 1.4(1.0 to 1.7).

“Halogenated ethers, alcohols, and alkanes activate TASK-3 tandem pore potassium channels likely through a common mechanism”. Anita Luethy, James D. Boghosian, Rithu Srikantha, and Joseph F. Cotten. *Molecular Pharmacology*.

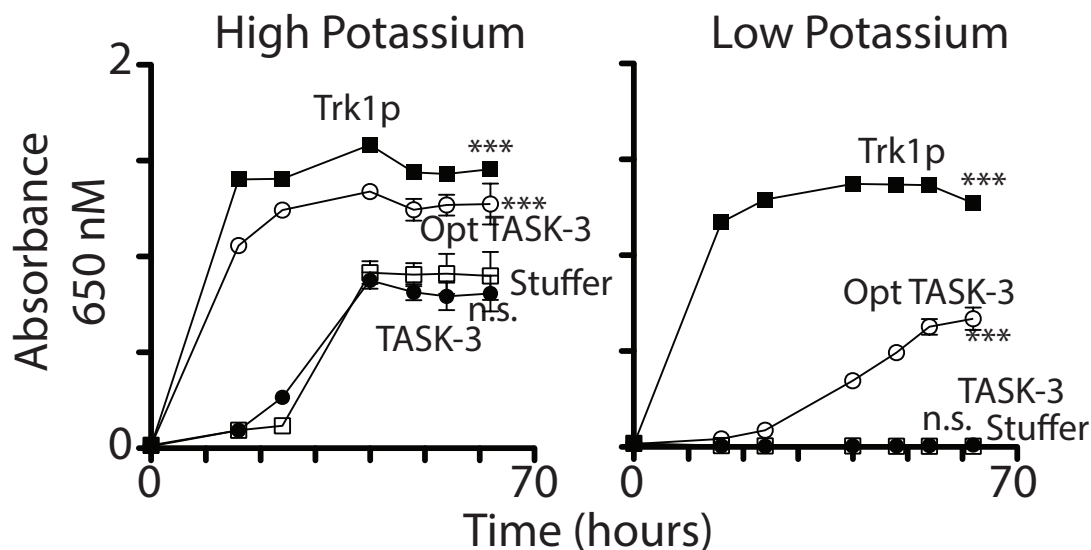

**Figure S5. Trk1p and "yeast optimized" TASK-3 promote *trk1Δtrk2Δ* *Saccharomyces cerevisiae* growth in low potassium media.** Growth measurements of the potassium-sensitive strain *trk1Δtrk2Δ* *Saccharomyces cerevisiae* after transformation with cDNA encoding Trk1p, "yeast optimized" TASK-3 (Opt TASK-3), wild-type TASK-3, or non-functional Kir 2.1 "stuffer". Yeast were cultured in 96 well format at 30°C in HIGH potassium (100 mM KCl; left side of figure) or LOW potassium (no added KCl; right side). Growth was quantified by repeated A650 nM measurements. "Yeast optimized" TASK-3 contains the following missense mutations: T17I, D27E, D32G, K79E, F202L, and F246Y. Statistical significance at the 62 hour data point was determined using a one-way ANOVA and a post-hoc Bonferroni multiple comparison test. n=4 to 6 ± SD for each. n.s., indicates no significant difference; and \*\*\*, indicates P < 0.0001 relative to yeast transformed with the non-functional Kir 2.1 "stuffer" channel.

“Halogenated ethers, alcohols, and alkanes activate TASK-3 tandem pore potassium channels likely through a common mechanism”. Anita Luethy, James D. Boghosian, Rithu Srikantha, and Joseph F. Cotten. *Molecular Pharmacology*.

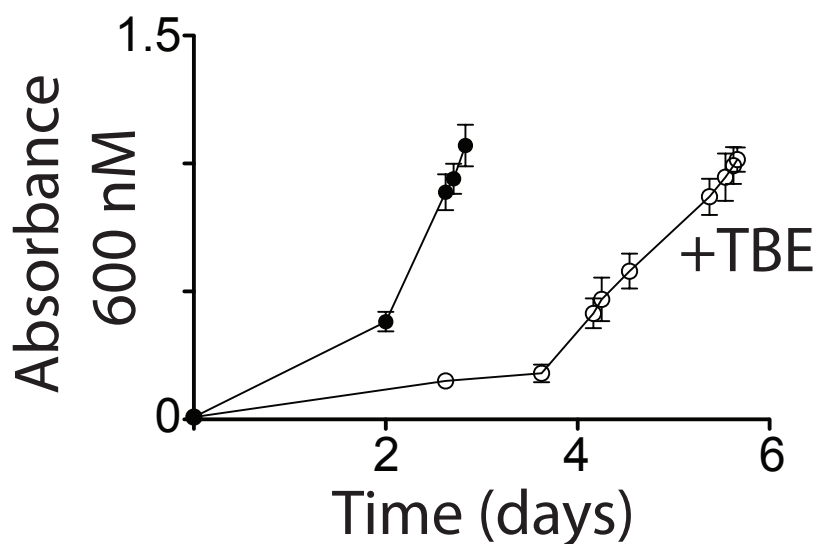

**Figure S6. Rate of yeast growth in the presence of 2,2,2-tribromoethanol (TBE).** Potassium-sensitive *trk1Δtrk2Δ Saccharomyces cerevisiae* yeast transformed with "yeast optimized" wild-type TASK-3 or "yeast optimized" V136E TASK-3 were mixed at an initial ratio of 1:1 and cultured in low potassium media in the presence (open circles) or absence (black circles) of 1 mM TBE. Growth was assessed by repeated A600 measurements.  $n = 4 \pm \text{SD}$  for each.

“Halogenated ethers, alcohols, and alkanes activate TASK-3 tandem pore potassium channels likely through a common mechanism”. Anita Luethy, James D. Boghosian, Rithu Srikantha, and Joseph F. Cotten. *Molecular Pharmacology*.

|                        |      |
|------------------------|------|
| Ethanol                | 190  |
| 2,2,2-Trifluoroethanol | 23.8 |
| 2,2,2-Trichloroethanol | 0.74 |
| 2,2,2-Tribromoethanol  | 0.30 |
| Chloral Hydrate        | 1.6  |
| $\alpha$ -Chloralose   | 0.53 |
| Halothane              | 0.23 |
| Isoflurane             | 0.29 |

Table S1. Anesthetic concentration (in mM) required for loss of righting reflex in *Xenopus laevis* tadpoles. Values were obtained from Krasowski and Harrison, 2000 and Firestone, 1986.
